1 ***FMRI* loss results in early changes to intrinsic membrane**  
2 **excitability in human cellular models**

3

4 Sara G. Susco<sup>1,2,+</sup>, Mario A. Arias-Garcia<sup>1,3,†,+</sup>, Violeta G. Lopez-Huerta<sup>1,3,††</sup>, Amanda Beccard<sup>1</sup>,  
5 Anne M. Bara<sup>1</sup>, Jessica Moffitt<sup>1</sup>, Justin Korn<sup>1</sup>, Zhanyan Fu<sup>1,3,\*</sup> and Lindy E. Barrett<sup>1,2,\*</sup>.

6

7

8 **Affiliations:**

9 <sup>1</sup>Stanley Center for Psychiatric Research, Broad Institute of MIT and Harvard, Cambridge MA  
10 02142, USA.

11 <sup>2</sup>Department of Stem Cell and Regenerative Biology, Harvard University, Cambridge, MA  
12 02138, USA.

13 <sup>3</sup>McGovern Institute for Brain Research in the Department of Brain and Cognitive Sciences at  
14 MIT, Cambridge, MA 02139, USA.

15 <sup>†</sup> Current Address: Departamento de Psicobiología y Neurociencias, Facultad de Psicología,  
16 Universidad Nacional Autónoma De México, México City, México.

17 <sup>††</sup>Current Address: Instituto de Fisiología Celular, Universidad Nacional Autónoma De México,  
18 México City, México.

19 <sup>+</sup>These authors contributed equally.

20 \*Correspondence: [lbarrett@broadinstitute.org](mailto:lbarrett@broadinstitute.org) and [zfu@broadinstitute.org](mailto:zfu@broadinstitute.org)

21

## 22 **Abstract**

23 *Fragile X mental retardation 1 (FMR1)* encodes the RNA binding protein FMRP. Loss of FMRP  
24 drives Fragile X syndrome (FXS), the leading inherited cause of intellectual disability and a  
25 leading monogenic cause of autism. Cortical hyperexcitability is a hallmark of FXS, however,  
26 the underlying mechanisms reported, including alterations in synaptic transmission and ion  
27 channel expression and properties, are heterogeneous and at times contradictory. Here, we  
28 generated isogenic *FMR1*<sup>y/+</sup> and *FMR1*<sup>y/-</sup> human pluripotent stem cell (hPSC) lines using  
29 CRISPR-Cas9, differentiated these stem cell tools into excitatory cortical neurons and  
30 systematically assessed the impact of FMRP loss on intrinsic membrane and synaptic properties  
31 over the course of *in vitro* differentiation. Using whole-cell patch clamp analyses at five separate  
32 time-points, we observed significant changes in multiple metrics following FMRP loss, including  
33 decreased membrane resistance, increased capacitance, decreased action potential half-width and  
34 higher maximum frequency, consistent with *FMR1*<sup>y/-</sup> neurons overall showing an increased  
35 intrinsic membrane excitability compared with age-matched *FMR1*<sup>y/+</sup> controls. Surprisingly, a  
36 majority of these changes emerged early during *in vitro* differentiation and some were not stable  
37 over time. Although we detected significant differences in intrinsic properties, no discernable  
38 alterations were observed in synaptic transmission. Collectively, this study provides a new  
39 isogenic hPSC model to study the mechanisms of *FMR1* gene function, identifies  
40 electrophysiological impacts of FMRP loss on human excitatory cortical neurons over time *in*  
41 *vitro*, and underscores that early developmental changes to intrinsic membrane properties may be  
42 a critical cellular pathology contributing to cortical hyperexcitability in FXS.

43

## 44 **Introduction**

45 Fragile X syndrome (FXS) is caused by a repeat expansion in the 5'UTR of *Fragile X mental*  
46 *retardation 1 (FMR1)*, leading to loss of Fragile X mental retardation protein (FMRP)(1-3).  
47 Studies using EEG and fMRI have revealed significant differences in cortical excitability  
48 between FXS patients and unaffected controls (4-6). Paralleling these results, a large body of  
49 experimental research in animal models reports altered excitability in the cerebral cortex  
50 following FMRP loss (7-9), which may be due to mis-regulation of RNA targets encoding  
51 synapse-associated proteins. While human pluripotent stem cell (hPSC) models of FXS hold  
52 great promise for dissection of human disease relevant mechanisms and drug screening, they  
53 have yielded diverse, and at times conflicting data on the impact of FMRP loss on human neurite  
54 development, synaptic connectivity and intrinsic and synaptic properties (7, 10-12). Even  
55 fundamental measurements such as neurite outgrowth have been reported to be decreased (10,  
56 11), increased (12) or unchanged (7) following FMRP loss in different hPSC models. A  
57 combination of technical and experimental variables such as differences in genetic backgrounds,  
58 constitutive versus inducible FMRP loss, different cell type(s) and cell ratios generated by  
59 distinct *in vitro* differentiation paradigms, inclusion or exclusion of multiple additional cell types  
60 in co-cultures such as mouse neurons or glia, and different time-points of analyses all likely  
61 contribute to varying phenotypic presentations. This further implies that some FXS cellular  
62 phenotypes may be sufficiently subtle as to not rise above these technical and biological sources  
63 of variation (7), complicating cross study comparisons and extrapolation to the human disease  
64 state *in vivo*. While the lack of congruity across studies presents a challenge, careful assessment  
65 of different sources of variance will likely facilitate a more holistic view of the impact of FMRP  
66 loss on neuronal development, synaptic connectivity and function in the human brain. In  
67 particular, a majority of studies of the impacts of FMRP loss on physiological function focus on

68 a single time-point of analysis, which led us to consider the initial pathological changes due to  
69 FMRP loss and how such changes dynamically evolve over different stages of differentiation.  
70 Specifically, we utilized CRISPR-Cas9 technology to generate isogenic hPSC lines with  
71 or without constitutive FMRP loss and used these cellular tools to generate excitatory cortical  
72 neurons from a well-established *in vitro* differentiation paradigm (7, 13-22). To gain insight into  
73 the physiological response to *FMRI* loss over the course of *in vitro* differentiation, we measured  
74 intrinsic membrane properties and synaptic transmission in isogenic *FMRI*<sup>y/+</sup> and *FMRI*<sup>y/-</sup>  
75 neurons at five separate time-points from two to five weeks of *in vitro* differentiation. We  
76 identified significant cell intrinsic defects but not synaptic transmission deficits driven by FMRP  
77 loss in these cellular systems. Moreover, these differences began to emerge relatively early  
78 during *in vitro* differentiation and several metrics dynamically changed over time, which may  
79 account for some of the previous discrepancies reported in the literature.

80

## 81 **Results**

82 To facilitate analyses of FMRP loss isolated from differences in genetic background, we first  
83 generated and validated *FMRI*<sup>y/+</sup> and *FMRI*<sup>y/-</sup> isogenic hPSC lines (referred to as *FMRI* WT and  
84 *FMRI* KO, respectively) by targeting exon 4 of *FMRI* with CRISPR-Cas9 in the XY line H1  
85 (**Fig. 1A**). Indels in exon 4 of *FMRI* led to complete loss of FMRP expression (**Fig. 1B**) and loss  
86 of FMRP did not prevent hPSC differentiation into excitatory neurons (**Fig. 1C**), consistent with  
87 previous reports using a similar differentiation paradigm (7). Targeted cell lines maintained  
88 pluripotency, tri-lineage potential and karyotype stability (**Fig. S1 and data not shown**).

89

90 To understand how constitutive loss of FMRP affects the electrophysiological profiles of  
91 human excitatory neurons, we first assessed intrinsic membrane properties. For all whole-cell  
92 patch clamp experiments, *FMRI* WT and *FMRI* KO neurons were plated at densities of 40,000  
93 cells/cm<sup>2</sup> with mouse glia on glass coverslips. hPSCs used for *in vitro* differentiation were  
94 infected with CAMK2A-GFP or CAMK2A-mOrange and only GFP<sup>+</sup> or mOrange<sup>+</sup> neurons  
95 were used for patch clamp analyses in order to select for neurons sufficiently mature as to  
96 express CAMK2A, as previously described (13). Neurons from each genotype were recorded  
97 from up to five separate batches of *in vitro* differentiation at five separate time-points from days  
98 11 to 35 (D11, D14, D21, D28 and D35) (**Fig. S2**). As shown in **Fig. 2A**, we first assessed  
99 passive membrane properties of the neurons including: resting membrane potential (RMP),  
100 membrane resistance (R<sub>m</sub>), membrane time constant (Tau) and membrane capacitance (C<sub>m</sub>).  
101 From these properties, we observed significant differences in R<sub>m</sub> and C<sub>m</sub> in *FMRI* KO  
102 compared to *FMRI* WT neurons, but no changes to RMP or Tau at any time-point measured  
103 (**Fig. 2B-E**). Specifically, we observed decreased R<sub>m</sub> and increased C<sub>m</sub> in *FMRI* KO neurons  
104 relative to *FMRI* WT neurons (**Figs. 2C, E**). However, only changes to R<sub>m</sub> remained significant  
105 across time from D14-D35 (**Fig. 2C**), while C<sub>m</sub> appeared dynamic, with significant differences  
106 observed at D14 and D35 and no significant differences at D11, D21 or D28 (**Fig. 2E**). While  
107 both significant parameters (i.e., decreased R<sub>m</sub> and increased C<sub>m</sub> in *FMRI* KO neurons relative  
108 to *FMRI* WT neurons) are consistent with *FMRI* KO neurons showing an increased maturation  
109 profile compared with age-matched *FMRI* WT control neurons, they also suggest that the  
110 neurons undergo dynamic shifts in their physiological properties over time in response to  
111 constitutive *FMRI* loss. Our data are also consistent with FMRP driving early (D14) changes to  
112 intrinsic membrane properties.  
113

114 We next assessed the active membrane properties of the neurons, including action  
115 potential threshold (AP<sub>thres</sub>), action potential half-width (AP<sub>hw</sub>), action potential amplitude  
116 (AP<sub>amp</sub>), after hyperpolarization (AHP) and maximum frequency (**Fig. 3A**). From these  
117 properties, we observed a significant increase in firing frequency at D21, D28 and D35 and  
118 decreased AP<sub>hw</sub> at D11 and D14 in *FMRI* KO neurons relative to *FMRI* WT neurons, with no  
119 changes to AP<sub>thres</sub>, AP<sub>amp</sub> or AHP at any time-point measured (**Fig. 3B-G**). Significant  
120 differences in AP<sub>hw</sub> were evident early during *in vitro* differentiation at D11 and D14 but these  
121 differences disappeared at later time-points (**Fig. 3B**), suggesting that neurons may undergoing  
122 compensatory changes over time. Significant differences in firing frequency curves and  
123 maximum frequency emerged after D21 and remained until D35 (**Fig. 3F-G**). As with decreased  
124 R<sub>m</sub> and increased C<sub>m</sub> in *FMRI* KO neurons relative to *FMRI* WT neurons described above  
125 (**Fig. 2C, E**), increased maximum frequency and decreased AP<sub>hw</sub> are consistent with *FMRI* KO  
126 neurons showing an increased maturation profile compared with age-matched *FMRI* WT control  
127 neurons.

128 Finally, we measured synaptic transmission including mean amplitude and frequency of  
129 synaptic events as well as the percentage of neurons with spontaneous excitatory post-synaptic  
130 currents (sEPSCs) in the absence of the AP blocker tetrodotoxin (TTX) (**Fig. 4**) from the same  
131 neurons used to assess intrinsic properties (**Figs. 2-3**). We did not detect differences in any of  
132 these synaptic properties measured under steady state conditions (**Fig. 4A-D**).

133

## 134 **Discussion**

135 By generating isogenic *FMRI* WT and *FMRI* KO cell lines plated under identical culture  
136 conditions and recorded from up to five separate batches of *in vitro* differentiation over five

137 separate time-points, we observed subtle but significant differences in intrinsic membrane  
138 properties that collectively suggest an increased physiological maturation profile of *FMRI* KO  
139 neurons compared to *FMRI* WT controls, consistent with previous studies describing  
140 electrophysiological and neural network activity in mouse models of FXS (23-28). Our results  
141 suggest that early developmental changes in the intrinsic membrane properties could potentially  
142 underlie subsequent cortical hyperexcitability and other related neurological deficits associated  
143 with FXS. Given that human *in vitro* derived neurons most closely resemble prenatal cell stages  
144 *in vivo* (13), these analyses underscore the importance for future studies to identify the ionic  
145 cellular mechanisms underlying the hyperexcitability in FXS during prenatal development. Of  
146 note, not all phenotypes were stable over time, and indeed we observed dynamic changes in  
147 multiple metrics, suggesting that neurons respond to constitutive FMRP loss as they differentiate  
148 *in vitro* and some discrepancies in the literature may be due to differing time-points of analysis.  
149 Indeed, a majority of studies using *in vitro* human neuronal of disease assess electrophysiological  
150 properties at a single time-point (7, 15, 16). Although we detected significant differences in  
151 intrinsic properties, we did not uncover alterations in synaptic function consistent with a previous  
152 study of FXS using the same neuronal cell type (7). This suggests that additional cell types or  
153 conditions may be required to unmask synaptic phenotypes *in vitro*. For example, our inclusion  
154 of mouse glia increased the health and viability of our neuronal cultures, but could also reduce  
155 phenotypic severity if glia contribute to electrophysiological phenotypes in FXS, as reported in  
156 other experimental contexts (29-31). While our experiments allow us to sensitively reveal  
157 phenotypes specific to excitatory cortical neurons, they cannot capture the complex relationship  
158 with inhibitory neurons and how this may drive network perturbations. Though our isogenic  
159 system eliminates variability in genetic background between patient and control samples and

160 thus allows for the detection of more subtle phenotypes, given the variability reported in both  
161 FXS molecular phenotypes (e.g., differing levels of protein synthesis changes across  
162 patients)(32) as well as FXS clinical presentations (e.g., the fact that a subset of patients have  
163 seizures and a subset do not)(33), physiological phenotypes *in vitro* may similarly vary across  
164 different parental cell lines. Our study identifies specific time-points and conditions in human *in*  
165 *vitro* derived cortical neurons for further investigation. Future studies will be required to fully  
166 understand how different patient brain cell types respond to *FMRI* loss over time and how this  
167 impacts the development of more complex networks of human excitatory neurons, inhibitory  
168 neurons and astrocytes. hPSC models are well positioned to address increasingly complex  
169 questions related to the impact of a defined genetic change on multiple or mixed brain cell types  
170 to uncover key developmental mechanisms with relevance to human disease.

171

## 172 **Materials and Methods**

### 173 **Stem cell culture and CRISPR-Cas9 based genome engineering**

174 The human embryonic stem cell line H1 (34) was obtained commercially from WiCell Research  
175 Institute (<https://www.wicell.org>). All studies using H1 followed institutional IRB and ESCRO  
176 guidelines approved by Harvard University. Stem cell culture and assessment of pluripotency  
177 and tri-lineage potential was carried out as previously described (35-37). In brief, stem cells were  
178 grown and maintained in mTeSR1 medium (Stem Cell Technologies) on geltrex-coated plates  
179 (Life Technologies). Cells were routinely tested to confirm the absence of mycoplasma  
180 contamination (Lonza MycoAlert). CRISPR-Cas9 based genome engineering experiments were  
181 carried out as previously described (35-37). In brief, H1 was transfected with pre-assembled  
182 Cas9 protein (NEB) + crRNA and tracrRNA (Synthego), targeting full-length *FMRI* upstream of



183 predicted functional domains (gRNA: GTTGGTGGTTAGCTAAAGTG), using the NEON  
184 system (Life Technologies). Wild-type cells are those that went through the gene-targeting  
185 protocol but were not edited. Antibodies used to assess pluripotency were anti-OCT3/4 (R&D  
186 Systems AF1759), anti-SOX2 (BD 245619), and anti-TRA-1-60 (Santa Cruz Biotechnology sc-  
187 21705). Antibodies used to assess tri-lineage potential were anti-AFP (Sigma A8452), anti-SMA  
188 (Sigma A2547), and anti- $\beta$ -III-Tubulin (R&D Systems MAB1195).

189

## 190 **Generation of human excitatory cortical neurons**

191 Human neurons were generated as previously described (13, 14). In brief, H1 hPSCs were  
192 transduced with TetO-Ngn2-T2A-Puro and Ubiq-rtTA lentivirus and treated with doxycycline to  
193 induce ectopic Ngn2 expression combined with the extrinsic addition of SMAD inhibitors  
194 (SB431542, 1614, Tocris, and LDN-193189, 04-0074, Stemgent), Wnt inhibitors (XAV939, 04-  
195 00046, Stemgent) and neurotrophins (BDNF, GDNF, CNTF) followed by puromycin  
196 treatment to eliminate uninfected stem cells. Ultra-high lentiviral titer was generated by Alstem,  
197 LLC.

198

## 199 **Whole-cell patch clamp analysis**

200 Stem cells were infected with CAMK2A-GFP or CAMK2A-mOrange ultra-high titer lentivirus  
201 (Alstem, LLC) and differentiated into neurons as described above. At D4, neurons were plated at  
202 a density of 40,000 cells/cm<sup>2</sup> on a bed of mouse glia on poly-D-lysine and laminin coated glass  
203 coverslips with Geltrex coating. Neurons were kept in NBM supplemented with B27 and  
204 neurotrophins. Whole-cell patch clamp recordings were performed at five time-points: Days 11,  
205 14, 21, 28 and 35. Cultured neurons were transferred to a recording chamber and constantly

206 perfused at a speed of 3ml/min with an extracellular solution containing (in mM): 119 NaCl, 2.3  
207 KCl, 2 CaCl<sub>2</sub>, 1 MgCl<sub>2</sub>, 15 HEPES, 5 glucose, phenol red (0.25mg/L) and D-serine (10μM) (all  
208 from Sigma) adjusted to pH 7.2-7.4 with NaOH. Osmolarity was adjusted to 325 mOsm with  
209 sucrose. Recording pipettes (KG33, King Precision Glass) were pulled in a horizontal pipette  
210 puller (P-97, Sutter Instruments) with a tip resistance of 3–5 MΩ. Pipettes were filled with an  
211 internal solution containing in mM: 120 K-Gluconate, 2 MgCl<sub>2</sub>, 10 HEPES, 0.5 EGTA, 0.2  
212 Na<sub>2</sub>ATP, and 0.2 Na<sub>3</sub>GTP. All experiments were performed at room temperature. The  
213 recordings were made with a microelectrode amplifier with bridge and voltage clamp modes of  
214 operation (Multiclamp 700B, Molecular Devices). Cell membrane potential was held at -60 mV,  
215 unless specified otherwise. Signals were low-pass filtered at 2 kHz and sampled at 10kHz with a  
216 Digidata 1440A (Molecular Devices). All data were stored on a computer for subsequent off-line  
217 analysis. Cells in which the series resistance (R<sub>s</sub>, typically 8–12 MΩ) changed by >20% were  
218 excluded for data analysis. In addition, cells with R<sub>s</sub> more than 25 MΩ at any time during the  
219 recordings were discarded. Conventional characterization of neurons was made in voltage and  
220 current clamp configurations. The membrane resistance, time constant (tau) and capacitance  
221 were measured in current clamp mode as described previously (38). CAMK2A expressing  
222 neurons were identified for recordings on the basis of GFP or mOrange expression visualized  
223 with a microscope equipped with GFP and Texas red filter (BX-51WI, Olympus). The  
224 electrophysiologists were blinded to genotype until data analyses were complete. The number of  
225 individual neurons recorded from and the number of independent batches of neurons are shown  
226 in **Fig. S2**.

## 228 **Acknowledgements**

229 We thank members of the Barrett and Fu labs for insightful discussions and critical reading of  
230 the manuscript and John Sherwood for statistical advice and insight.

231

## 232 **References**

- 233 1. Darnell JC, Van Driesche SJ, Zhang C, Hung KY, Mele A, Fraser CE, et al. FMRP stalls  
234 ribosomal translocation on mRNAs linked to synaptic function and autism. *Cell*.  
235 2011;146(2):247-61.
- 236 2. Dictenberg JB, Swanger SA, Antar LN, Singer RH, Bassell GJ. A direct role for FMRP  
237 in activity-dependent dendritic mRNA transport links filopodial-spine morphogenesis to fragile  
238 X syndrome. *Developmental cell*. 2008;14(6):926-39.
- 239 3. Bagni C, Tassone F, Neri G, Hagerman R. Fragile X syndrome: causes, diagnosis,  
240 mechanisms, and therapeutics. *The Journal of clinical investigation*. 2012;122(12):4314-22.
- 241 4. Ethridge LE, White SP, Mosconi MW, Wang J, Pedapati EV, Erickson CA, et al. Neural  
242 synchronization deficits linked to cortical hyper-excitability and auditory hypersensitivity in  
243 fragile X syndrome. *Mol Autism*. 2017;8:22.
- 244 5. Berry-Kravis E. Epilepsy in fragile X syndrome. *Dev Med Child Neurol*.  
245 2002;44(11):724-8.
- 246 6. Musumeci SA, Hagerman RJ, Ferri R, Bosco P, Dalla Bernardina B, Tassinari CA, et al.  
247 Epilepsy and EEG findings in males with fragile X syndrome. *Epilepsia*. 1999;40(8):1092-9.
- 248 7. Zhang Z, Marro SG, Zhang Y, Arendt KL, Patzke C, Zhou B, et al. The fragile X  
249 mutation impairs homeostatic plasticity in human neurons by blocking synaptic retinoic acid  
250 signaling. *Science translational medicine*. 2018;10(452).
- 251 8. Gibson JR, Bartley AF, Hays SA, Huber KM. Imbalance of neocortical excitation and  
252 inhibition and altered UP states reflect network hyperexcitability in the mouse model of fragile X  
253 syndrome. *J Neurophysiol*. 2008;100(5):2615-26.
- 254 9. Larson J, Jessen RE, Kim D, Fine AK, du Hoffmann J. Age-dependent and selective  
255 impairment of long-term potentiation in the anterior piriform cortex of mice lacking the fragile X  
256 mental retardation protein. *The Journal of neuroscience : the official journal of the Society for*  
257 *Neuroscience*. 2005;25(41):9460-9.
- 258 10. Doers ME, Musser MT, Nichol R, Berndt ER, Baker M, Gomez TM, et al. iPSC-derived  
259 forebrain neurons from FXS individuals show defects in initial neurite outgrowth. *Stem Cells*  
260 *Dev*. 2014;23(15):1777-87.
- 261 11. Sheridan SD, Theriault KM, Reis SA, Zhou F, Madison JM, Daheron L, et al. Epigenetic  
262 characterization of the FMR1 gene and aberrant neurodevelopment in human induced pluripotent  
263 stem cell models of fragile X syndrome. *PLoS one*. 2011;6(10):e26203.
- 264 12. Boland MJ, Nazor KL, Tran HT, Szucs A, Lynch CL, Paredes R, et al. Molecular  
265 analyses of neurogenic defects in a human pluripotent stem cell model of fragile X syndrome.  
266 *Brain*. 2017;140(3):582-98.
- 267 13. Nehme R, Zuccaro E, Ghosh S, Li C, Sherwood J, Pietilainen O, et al. Combining NGN2  
268 Programming with Developmental Patterning Generates Human Excitatory Neurons with  
269 NMDAR-Mediated Synaptic Transmission. *Cell reports*. 2018;23(8):2509-23.

- 270 14. Zhang Y, Pak C, Han Y, Ahlenius H, Zhang Z, Chanda S, et al. Rapid single-step  
271 induction of functional neurons from human pluripotent stem cells. *Neuron*. 2013;78(5):785-98.
- 272 15. Pak C, Danko T, Zhang Y, Aoto J, Anderson G, Maxeiner S, et al. Human  
273 Neuropsychiatric Disease Modeling using Conditional Deletion Reveals Synaptic Transmission  
274 Defects Caused by Heterozygous Mutations in NRXN1. *Cell stem cell*. 2015;17(3):316-28.
- 275 16. Yi F, Danko T, Botelho SC, Patzke C, Pak C, Wernig M, et al. Autism-associated  
276 SHANK3 haploinsufficiency causes Ih channelopathy in human neurons. *Science*.  
277 2016;352(6286):aaf2669.
- 278 17. Lin YT, Seo J, Gao F, Feldman HM, Wen HL, Penney J, et al. APOE4 Causes  
279 Widespread Molecular and Cellular Alterations Associated with Alzheimer's Disease Phenotypes  
280 in Human iPSC-Derived Brain Cell Types. *Neuron*. 2018;98(6):1141-54 e7.
- 281 18. Marro SG, Chanda S, Yang N, Janas JA, Valperga G, Trotter J, et al. Neuroligin-4  
282 Regulates Excitatory Synaptic Transmission in Human Neurons. *Neuron*. 2019;103(4):617-26  
283 e6.
- 284 19. Meijer M, Rehbach K, Brunner JW, Classen JA, Lammertse HCA, van Linge LA, et al. A  
285 Single-Cell Model for Synaptic Transmission and Plasticity in Human iPSC-Derived Neurons.  
286 *Cell reports*. 2019;27(7):2199-211 e6.
- 287 20. Busskamp V, Lewis NE, Guye P, Ng AH, Shipman SL, Byrne SM, et al. Rapid  
288 neurogenesis through transcriptional activation in human stem cells. *Molecular systems biology*.  
289 2014;10:760.
- 290 21. Deneault E, White SH, Rodrigues DC, Ross PJ, Faheem M, Zaslavsky K, et al. Complete  
291 Disruption of Autism-Susceptibility Genes by Gene Editing Predominantly Reduces Functional  
292 Connectivity of Isogenic Human Neurons. *Stem cell reports*. 2018;11(5):1211-25.
- 293 22. Tian R, Gachechiladze MA, Ludwig CH, Laurie MT, Hong JY, Nathaniel D, et al.  
294 CRISPR Interference-Based Platform for Multimodal Genetic Screens in Human iPSC-Derived  
295 Neurons. *Neuron*. 2019;104(2):239-55 e12.
- 296 23. Lovelace JW, Wen TH, Reinhard S, Hsu MS, Sidhu H, Ethell IM, et al. Matrix  
297 metalloproteinase-9 deletion rescues auditory evoked potential habituation deficit in a mouse  
298 model of Fragile X Syndrome. *Neurobiology of disease*. 2016;89:126-35.
- 299 24. Goncalves JT, Anstey JE, Golshani P, Portera-Cailliau C. Circuit level defects in the  
300 developing neocortex of Fragile X mice. *Nature neuroscience*. 2013;16(7):903-9.
- 301 25. Truszkowski TL, James EJ, Hasan M, Wishard TJ, Liu Z, Pratt KG, et al. Fragile X  
302 mental retardation protein knockdown in the developing *Xenopus* tadpole optic tectum results in  
303 enhanced feedforward inhibition and behavioral deficits. *Neural Dev*. 2016;11(1):14.
- 304 26. Schaefer TL, Davenport MH, Grainger LM, Robinson CK, Earnheart AT, Stegman MS,  
305 et al. Acamprostate in a mouse model of fragile X syndrome: modulation of spontaneous cortical  
306 activity, ERK1/2 activation, locomotor behavior, and anxiety. *Journal of neurodevelopmental*  
307 *disorders*. 2017;9:6.
- 308 27. Danesi C, Achuta VS, Corcoran P, Peteri UK, Turconi G, Matsui N, et al. Increased  
309 Calcium Influx through L-type Calcium Channels in Human and Mouse Neural Progenitors  
310 Lacking Fragile X Mental Retardation Protein. *Stem cell reports*. 2018;11(6):1449-61.
- 311 28. Lovelace JW, Rais M, Palacios AR, Shuai XS, Bishay S, Popa O, et al. Deletion of *Fmr1*  
312 from Forebrain Excitatory Neurons Triggers Abnormal Cellular, EEG, and Behavioral  
313 Phenotypes in the Auditory Cortex of a Mouse Model of Fragile X Syndrome. *Cerebral cortex*.  
314 2019.

- 315 29. Higashimori H, Schin CS, Chiang MS, Morel L, Shoneye TA, Nelson DL, et al. Selective  
316 Deletion of Astroglial FMRP Dysregulates Glutamate Transporter GLT1 and Contributes to  
317 Fragile X Syndrome Phenotypes In Vivo. *The Journal of neuroscience : the official journal of the*  
318 *Society for Neuroscience*. 2016;36(27):7079-94.
- 319 30. Jawaid S, Kidd GJ, Wang J, Swetlik C, Dutta R, Trapp BD. Alterations in CA1  
320 hippocampal synapses in a mouse model of fragile X syndrome. *Glia*. 2018;66(4):789-800.
- 321 31. Jacobs S, Doering LC. Astrocytes prevent abnormal neuronal development in the fragile  
322 x mouse. *The Journal of neuroscience : the official journal of the Society for Neuroscience*.  
323 2010;30(12):4508-14.
- 324 32. Jacquemont S, Pacini L, Jonch AE, Cencelli G, Rozenberg I, He Y, et al. Protein  
325 synthesis levels are increased in a subset of individuals with fragile X syndrome. *Human*  
326 *molecular genetics*. 2018;27(21):3825.
- 327 33. Kaufmann WE, Kidd SA, Andrews HF, Budimirovic DB, Esler A, Haas-Givler B, et al.  
328 Autism Spectrum Disorder in Fragile X Syndrome: Cooccurring Conditions and Current  
329 Treatment. *Pediatrics*. 2017;139(Suppl 3):S194-S206.
- 330 34. Thomson JA, Itskovitz-Eldor J, Shapiro SS, Waknitz MA, Swiergiel JJ, Marshall VS, et  
331 al. Embryonic stem cell lines derived from human blastocysts. *Science*. 1998;282(5391):1145-7.
- 332 35. Hazelbaker DZ, Beccard A, Bara AM, Dabkowski N, Messana A, Mazzucato P, et al. A  
333 Scaled Framework for CRISPR Editing of Human Pluripotent Stem Cells to Study Psychiatric  
334 Disease. *Stem cell reports*. 2017;9(4):1315-27.
- 335 36. Bara AM, Messana A, Herring A, Hazelbaker DZ, Eggan K, Barrett LE. Generation of a  
336 TLE3 heterozygous knockout human embryonic stem cell line using CRISPR-Cas9. *Stem Cell*  
337 *Res*. 2016;17(2):441-3.
- 338 37. Herring A, Messana A, Bara AM, Hazelbaker DZ, Eggan K, Barrett LE. Generation of a  
339 TLE1 homozygous knockout human embryonic stem cell line using CRISPR-Cas9. *Stem Cell*  
340 *Res*. 2016;17(2):430-2.
- 341 38. Golowasch J, Thomas G, Taylor AL, Patel A, Pineda A, Khalil C, et al. Membrane  
342 capacitance measurements revisited: dependence of capacitance value on measurement method  
343 in nonisopotential neurons. *Journal of Neurophysiology*. 2009;102(4):2161-75.
- 344

## 345 **Figure Legends**

### 346 **Fig. 1. Generation of isogenic *FMRI* cellular resources.**

347 **A.** Schematic of CRISPR-Cas9 editing strategy targeting exon 4 of *FMRI* to generate isogenic *FMRI*<sup>+/+</sup> (WT) and  
348 *FMRI*<sup>-/-</sup> (KO) hPSC lines. **B.** Western blot analysis showing loss of FMRP in CRISPR edited *FMRI* KO hPSCs  
349 compared to *FMRI* WT hPSCs. **C.** Expression of  $\beta$ -III-Tubulin (green) in *FMRI* WT (left) and *FMRI* KO (right)  
350 neurons. Cells are counterstained with DAPI (blue). Scale bar = 50 $\mu$ m.

351

### 352 **Fig. 2. Constitutive *FMRI* loss leads to altered intrinsic membrane properties over time.**

353 **A.** Schematic of analysis parameters. **B.** Summary of resting membrane potential (RMP) measurements in *FMRI*  
354 WT (black) and *FMRI* KO (blue) neurons at indicated time-points. No significant differences were identified. **C.**  
355 Summary of membrane resistance (R<sub>m</sub>) measurements in WT (black) and KO (blue) neurons at indicated time-  
356 points. KO neurons showed significantly lower membrane resistance than their WT counterparts from D14 onward  
357 (\*\*p<0.01, \*p<0.05, unpaired t-test) indicative of a higher level of maturation. **D.** Summary of membrane time  
358 constant (Tau) measurements in WT (black) and KO (blue) neurons at indicated time-points. No significant  
359 differences were identified. **E.** Summary of membrane capacitance (C<sub>m</sub>) measurements in WT (black) and KO  
360 (blue) neurons at indicated time-points. KO neurons showed significantly higher C<sub>m</sub> compared with their WT  
361 counterparts at D14 and D35 but not at D11, D21 or D28 (\*p<0.05, unpaired t-test).

362

363 **Fig. 3. Constitutive *FMRI* loss leads to altered action potential properties over time.**

364 **A.** Schematic of action potential properties measured by whole-cell patch clamp analyses from five independent  
365 batches of *in vitro* differentiation across five time-points. **B.** Summary of AP half width measurements in *FMRI* WT  
366 (black) and *FMRI* KO (blue) neurons at indicated time-points. KO neurons showed significantly shorter AP<sub>hw</sub>  
367 compared to their WT counterparts at D11 and D14 (\*p<0.05, \*\*p<0.01, unpaired t-test). Inset shows a  
368 representative expanded action potential for WT and KO neurons at D14. **C-E.** Summary of AP<sub>thres</sub>, AP<sub>pamp</sub> and  
369 AHP measurements in WT (black) and KO (blue) neurons at indicated time-points. No significant differences were  
370 identified. **F.** Summary of the firing frequency curve as a response to increasing current injection in WT (black) and  
371 KO (blue) neurons at indicated time-points. KO neurons showed significantly higher maximum frequencies  
372 compared with WT neurons from D21 onward (\*p<0.05, \*\*p<0.01, \*\*\*p<0.001, unpaired t-test). **G.** Summary of  
373 maximum frequency measurements in WT (black) and KO (blue) neurons at indicated time-points. KO neurons  
374 showed significantly higher maximum frequencies compared with WT neurons from D21 onward (\*p<0.05,  
375 \*\*p<0.01, unpaired t-test).

376

377 **Fig. 4. Constitutive *FMRI* loss does not lead to significant differences in synaptic properties at steady-state.**

378 **A.** Sample traces showing spontaneous excitatory postsynaptic currents (sEPSCs) in WT (black) and KO (blue)  
379 neurons at D35. **B-D.** Summary of sEPSC amplitude (**B**), frequency (**C**) and percentage of cells that showed

380 responses (**D**) in WT (black) and KO (blue) neurons at indicated time-points. No significant differences were  
381 identified under steady state conditions.

382

383 **Fig. S1:** Assessment of pluripotency (left) and tri-lineage potential (right) for *FMRI* WT (top) and *FMRI* KO  
384 (bottom) hPSC lines.

385

386 **Fig. S2:** Chart showing the numbers of neurons and numbers of batches used for recordings. D=Days *in vitro*; (n)=  
387 number of neurons recorded from in total for each condition. Batch indicates the total number of independently  
388 generated sets of neurons utilized to measure the indicated properties.

389

## 390 **Other Information**

### 391 **Author contributions**

392 L.E.B., Z.F. and S.G.S. conceived the project and wrote the manuscript, S.G.S. performed stem  
393 cell and neuron culture. M.A.A-G. and V.G.L-H. performed and analyzed whole cell patch  
394 clamp experiments. A.B. and A.M.B. generated gene edited cell lines. J.M. and J.K. provided  
395 analytical support. and L.E.B. and Z.F. supervised the study and secured funding. All authors  
396 discussed results and edited the manuscript.

### 397 **Data availability**

398 All data is available in the manuscript or the supplementary materials. Cell lines are available  
399 upon request with appropriate institutional approvals and following WiCell regulations for cell  
400 line distribution.



# Figure 1

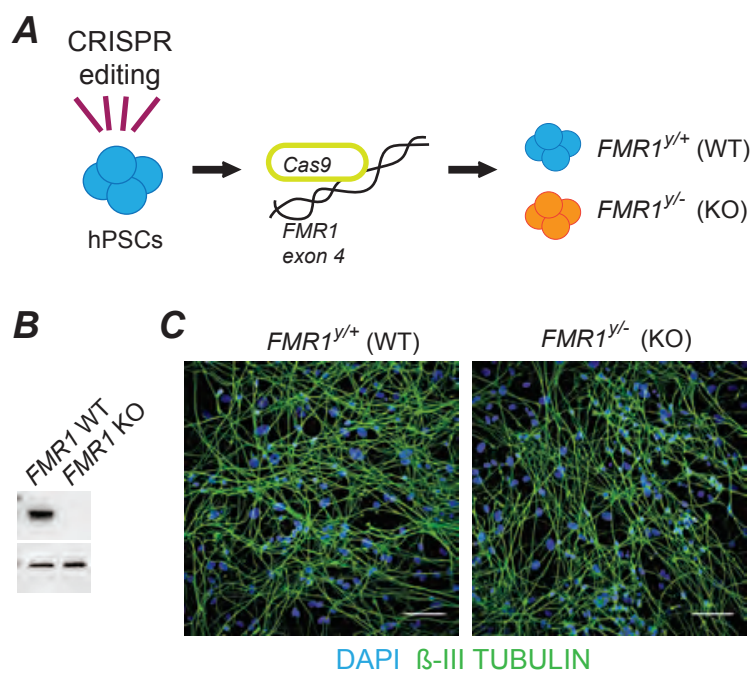



## Figure 2

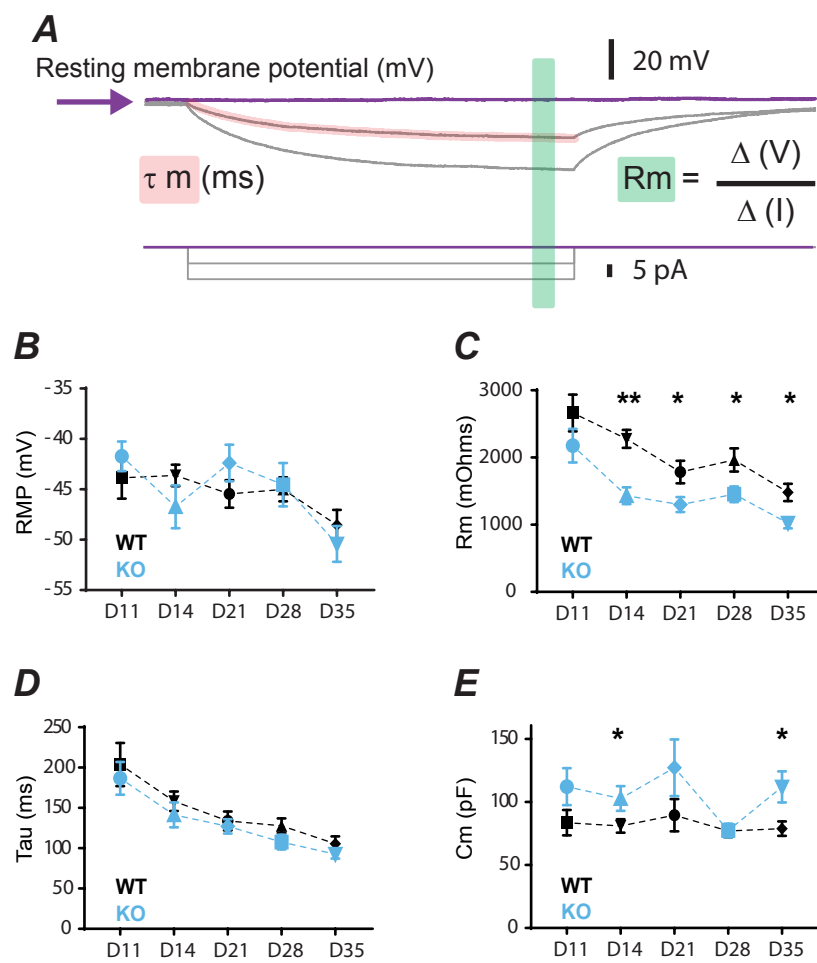

Figure 3

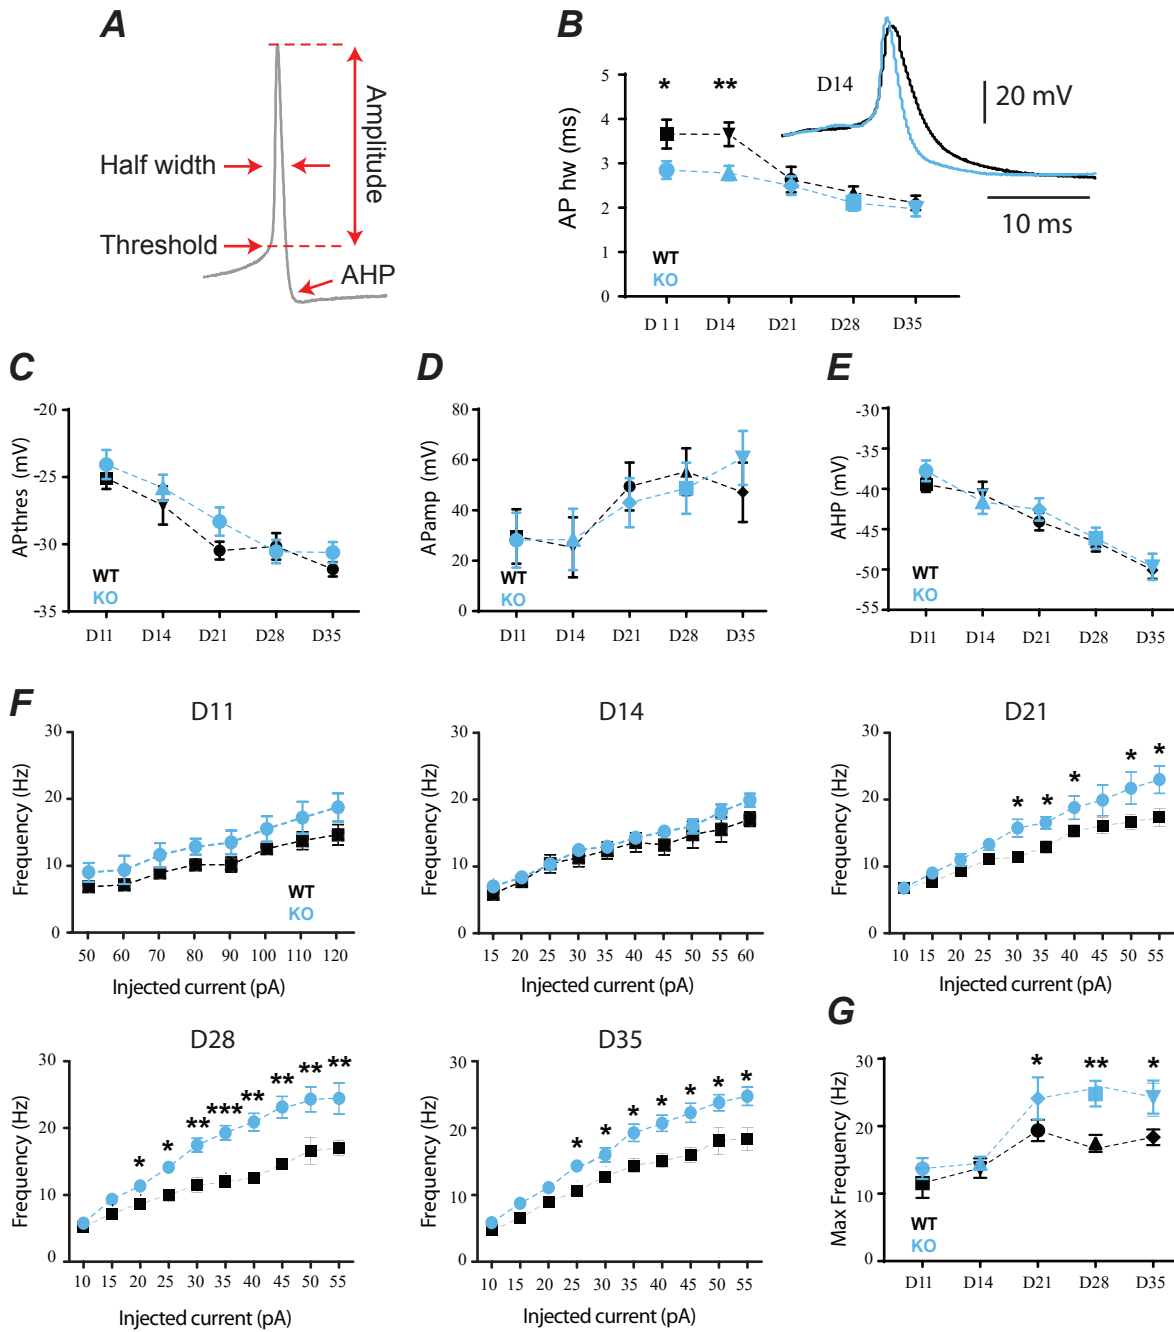

Figure 4

bioRxiv preprint doi: <https://doi.org/10.1101/2020.01.28.923425>; this version posted January 29, 2020. The copyright holder for this preprint (which was not certified by peer review) is the author/funder. All rights reserved. No reuse allowed without permission.

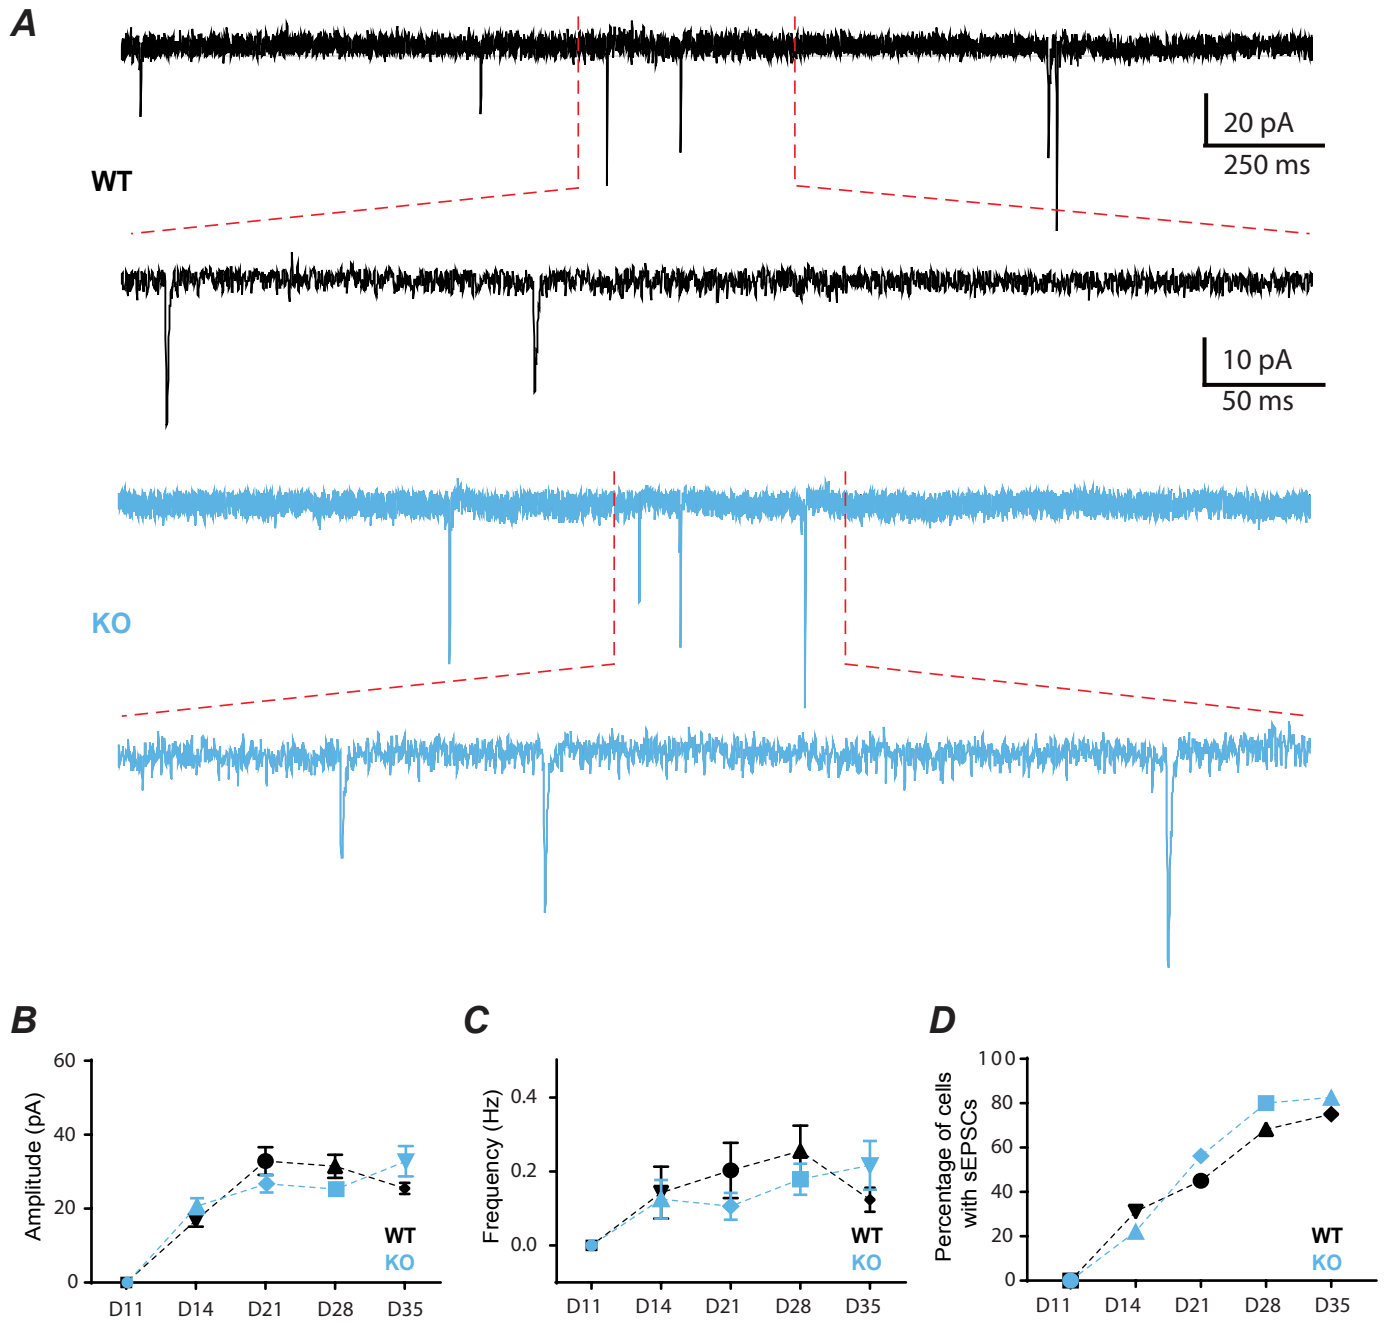

Supplementary Information

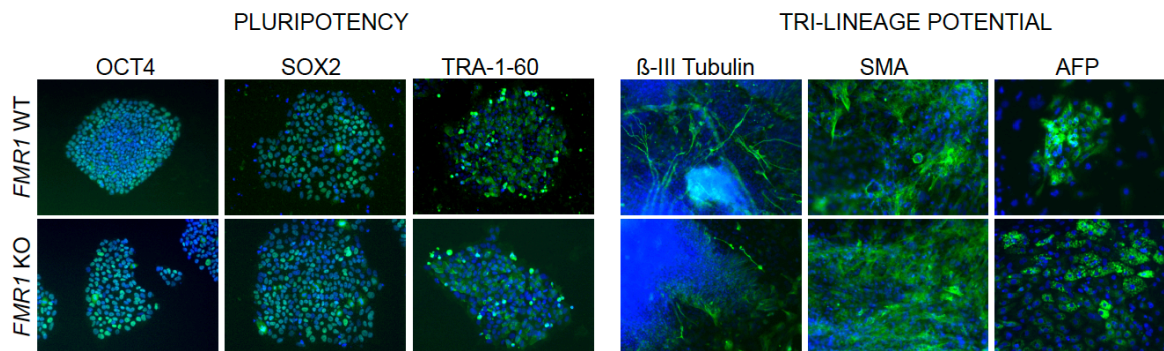

**Fig. S1**

| Intrinsic properties |    |    |    |    |    |    |    |    |    |    |
|----------------------|----|----|----|----|----|----|----|----|----|----|
| Genotype             | WT | KO | WT | KO | WT | KO | WT | KO | WT | KO |
| D                    | 11 |    | 14 |    | 21 |    | 28 |    | 35 |    |
| (n)                  | 24 | 27 | 40 | 35 | 35 | 33 | 38 | 32 | 36 | 29 |
| Batch                | 4  | 4  | 5  | 5  | 5  | 5  | 5  | 5  | 5  | 5  |

| Synaptic properties |      |      |      |      |      |      |      |       |      |       |
|---------------------|------|------|------|------|------|------|------|-------|------|-------|
| Genotype            | WT   | KO   | WT   | KO   | WT   | KO   | WT   | KO    | WT   | KO    |
| D                   | 11   |      | 14   |      | 21   |      | 28   |       | 35   |       |
| (n)                 | 0/17 | 0/15 | 5/16 | 2/14 | 4/15 | 8/15 | 8/15 | 11/15 | 9/15 | 11/15 |
| Batch               | 4    | 4    | 4    | 4    | 4    | 4    | 4    | 4     | 4    | 4     |

**Fig. S2**
